# Supplementary material for: Cardiomyocyte precursors generated by direct reprogramming and molecular beacon selection attenuate ventricular remodeling after experimental myocardial infarction
Source: Research Square preprint supplement (doi:10.21203/rs.3.rs-1449832/v1), 2022-03-31
Supplement: Supplementary file 1 [file dae4b664795ac26812b717e6.docx]

# **Supplementary Information**

**Cardiomyocyte precursors generated by direct reprogramming and molecular beacon selection attenuate ventricular remodeling after experimental myocardial infarction**

Dipthi Bachamanda-Somesh, Kristin Klose, Janita A. Maring, Désirée Kunkel, Karsten Jürchott, Stephanie I. Protze, Matthias Becker, Ulrike Krüger, Timo Z. Nazari-Shafti, Volkmar Falk, Andreas Kurtz, Manfred Gossen, Christof Stamm

**
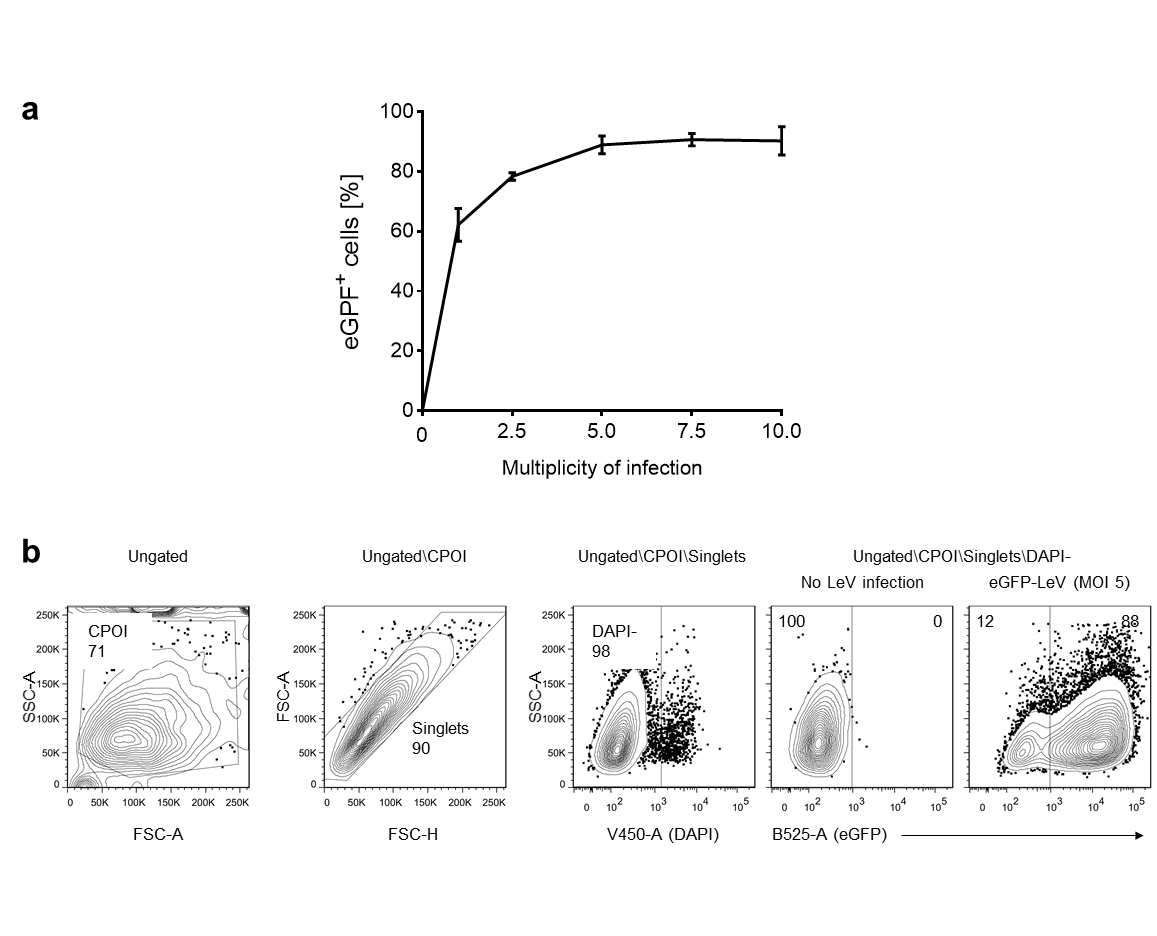
**

## Fig. S1

**Fig. S1** **Lentiviruses enable efficient transgene delivery into primary cardiac fibroblasts**. **a** Assessment of lentiviral transduction efficiency in cardiac fibroblasts by flow cytometry 3 days after eGFP-lentivirus (LeV) infection. At a multiplicity of infection (MOI) of 5, the transduction efficiency was 89 ± 3 %. Increasing the multiplicity of infection beyond 5 did not increase the transduction efficiency, but did increase cell death. Line graph shows mean ± SD (n=2). **b** Contour plots (contour level 5 %) show gating strategy used for flow cytometric analysis of eGFP expression in live, DAPI-negative cells. Quantitative data in all gates are given as percentage of the respective parent population. CPOI, cell population of interest


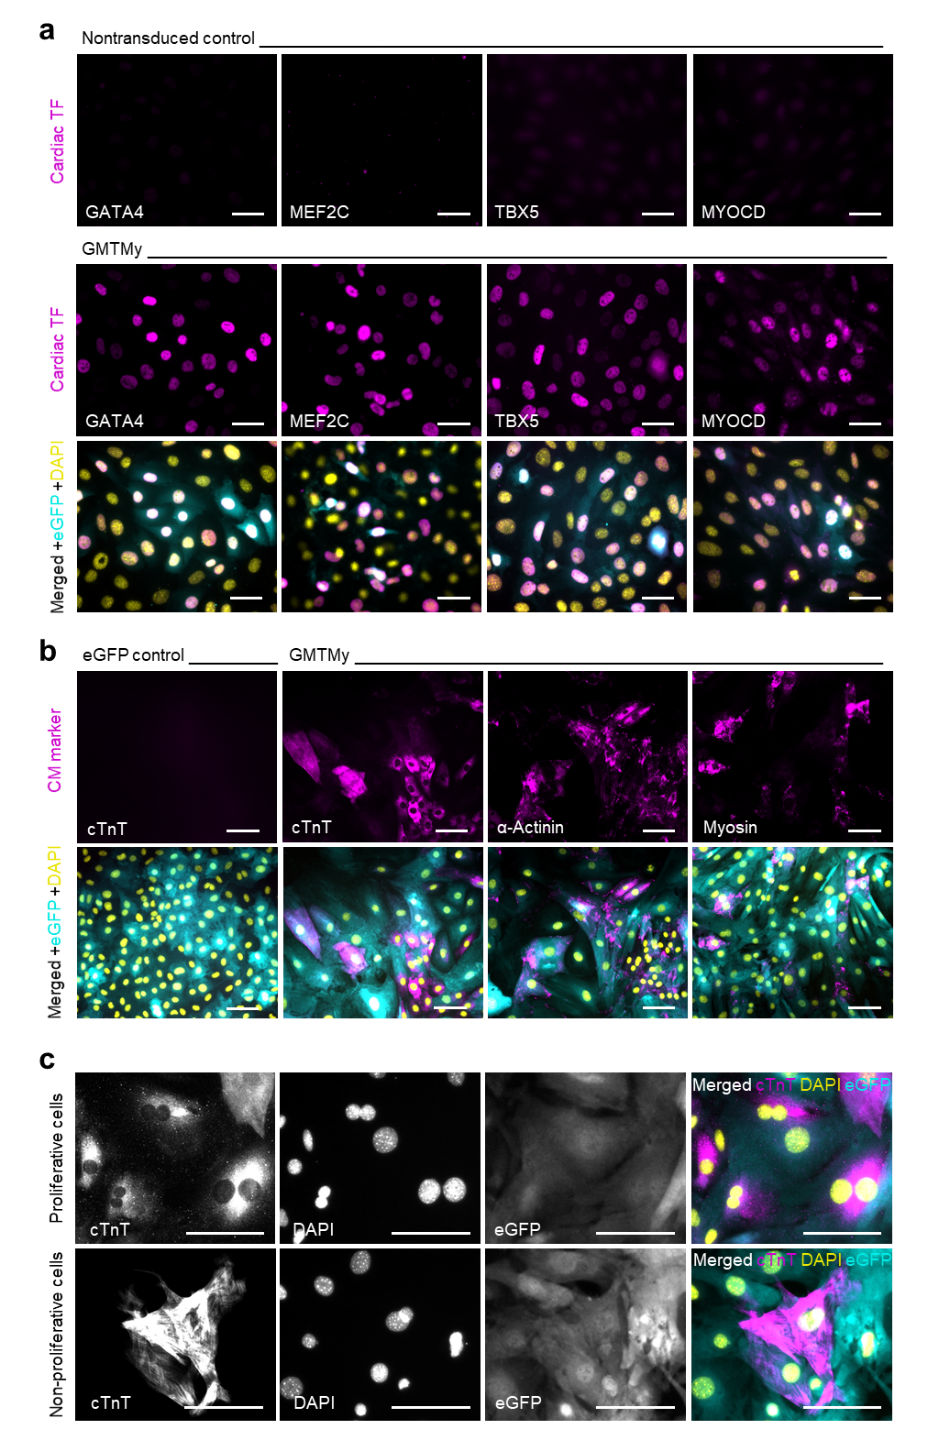


## Fig. S2

**Fig. S2** **GMTMy induces CM-specific protein expression.** **a** Immunofluorescent staining for GATA4, MEF2C, TBX5, or MYOCD (magenta) in nontransduced cardiac fibroblasts (marginal) and in fibroblasts (strong) 3 days after lentivirus infection confirms nuclear overexpression of cardiac transcription factors (TF). Similar overexpression patterns were observed in *GMTMy-*cotransduced cardiac fibroblasts. eGFP (cyan) marks transduced cells, DAPI (yellow) marks cell nuclei. Scale bars, 50 µm. **b** Immunofluorescent staining for cTnT, α-actinin, and myosin (magenta) in combination with eGFP (cyan) 14 days after infection with the GMTMy-lentivirus-cocktail indicates beginning transition toward CM fate. DAPI (yellow) marks cell nuclei. Scale bars, 100 µm. **c** Immunofluorescent staining for CM marker cTnT (magenta) in combination with eGFP (cyan) 14 days after GMTMy-lentivirus infection. DAPI (yellow) marks cell nuclei. Scale bars, 100 µm. Black-and-white images represent single channels, color images represent merged channels of high-magnification immunofluorescence images provided in Fig. 1b, showing that GMTMy coinduced immature, proliferating and more mature, nonproliferative cTnT-positive cells


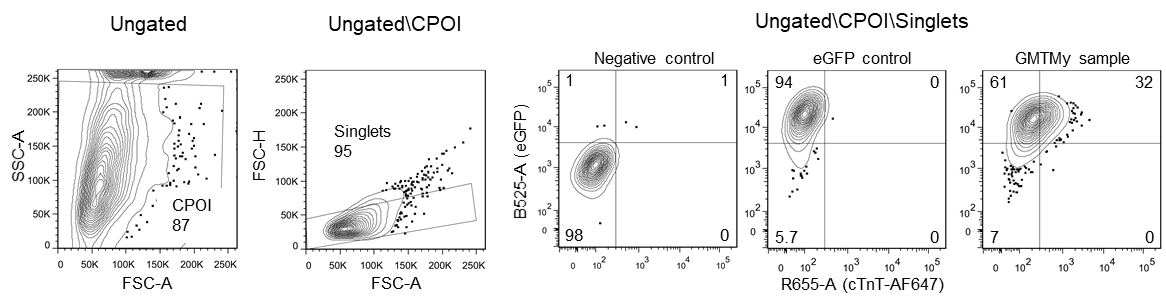


## Fig. S3

**Fig. S3** **Gating strategy used for flow cytometric analysis of cTnT protein expression.** Shown are contour plots (contour level 5 %). Quantitative data in all gates are given as percentage of the respective parent population. CPOI, cell population of interest

**
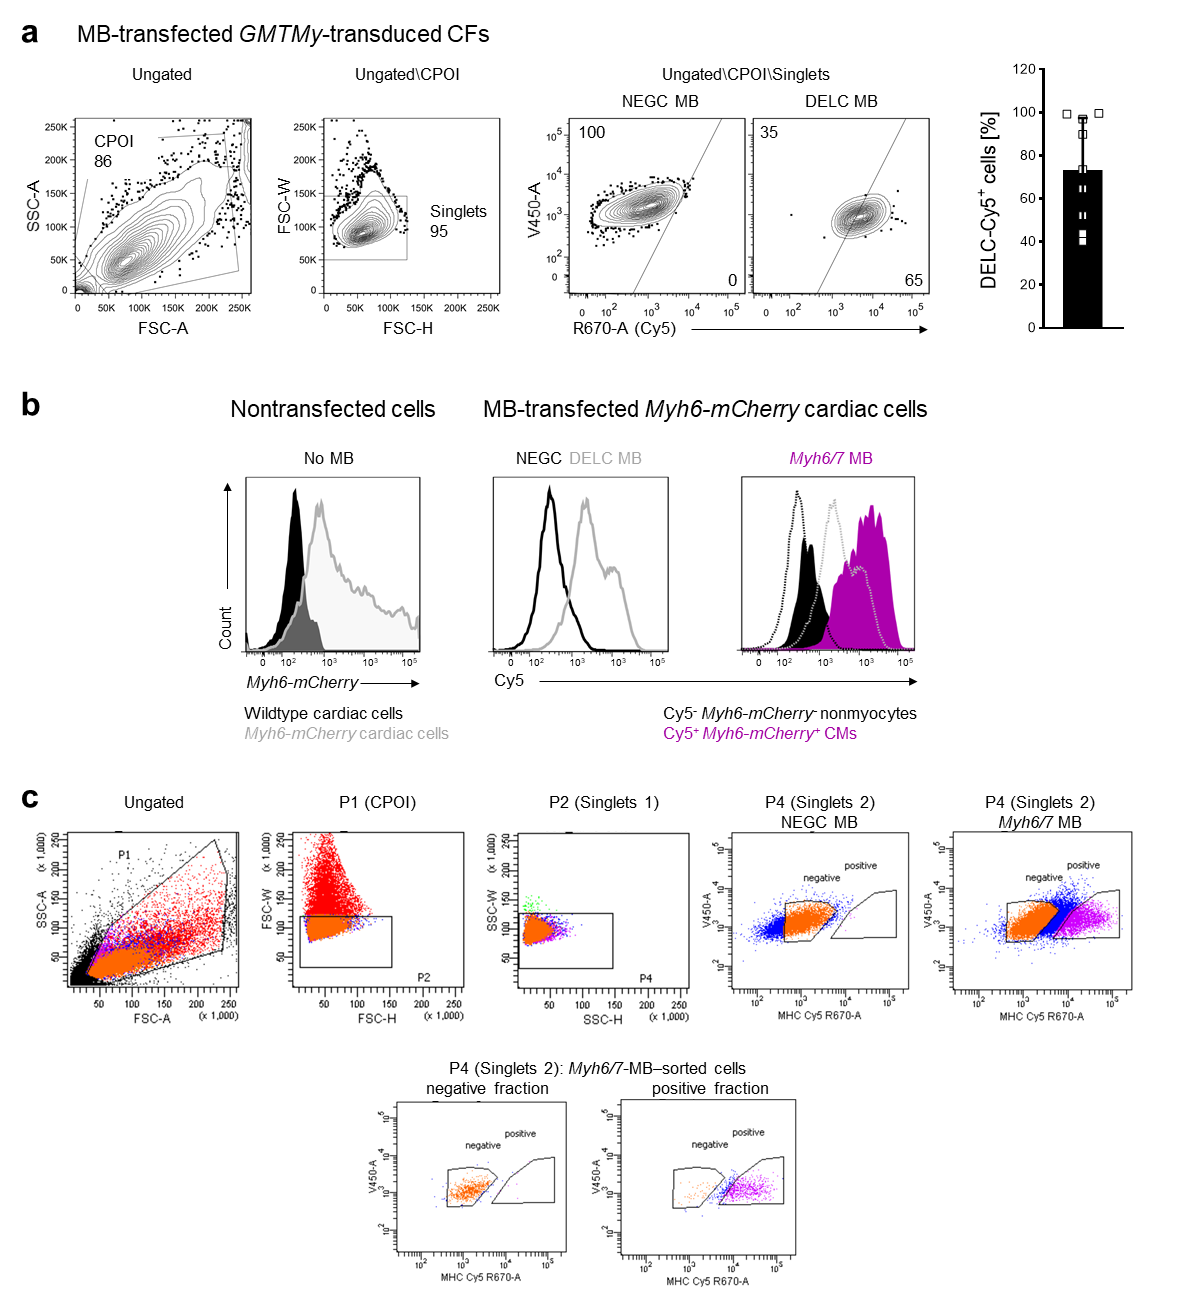
**

## Fig. S4

**Fig. S4** ***Myh6/7* molecular beacons can be efficiently delivered into adherent cells and specifically label CMs.** **a** The *Myh6/7*-beacon–based sorting protocol was established using negative control (NEGC, no sequence match, Cy5-BHQ2 label), delivery control (DELC, nonspecific sequence, Cy5-Cy5 label, no quencher), and *Myh6/7* probes (Cy5-BHQ2 label), which produce Cy5-fluorescence either after probe degradation (negative control), regardless of conformation (delivery control), or after hybridization to *Myh6/7* mRNA (*Myh6/7*). Molecular beacon (MB) transfection efficiency determined by flow cytometry using *GMTMy*-transduced cardiac fibroblasts transfected with negative and delivery control probes amounted to 73.3 ± 24.2 %, respectively. Contour plots (contour level 5 %) show the gating strategy and representative samples. Quantitative data in all gates are given as percentage of the respective parent population. The scatter plot with bar graph presents the proportion of Cy5-positive cells; shown are replicates and mean ± SD (n=9). **b** Assessment of molecular beacon specificity using cardiac cells isolated from wildtype and *Myh6*-*mCherry*–transgenic neonatal mice, transfected with negative control and *Myh6/7* probes and analyzed by flow cytometry. The overlayed histograms show that Cy5 fluorescence overlaps with *mCherry* positivity, demonstrating the specificity of the *Myh6/7* probes for myocytes. **c** Dot plots show gating strategy used for iCMP sorting. P1, population1; CPOI, cell population of interest

**
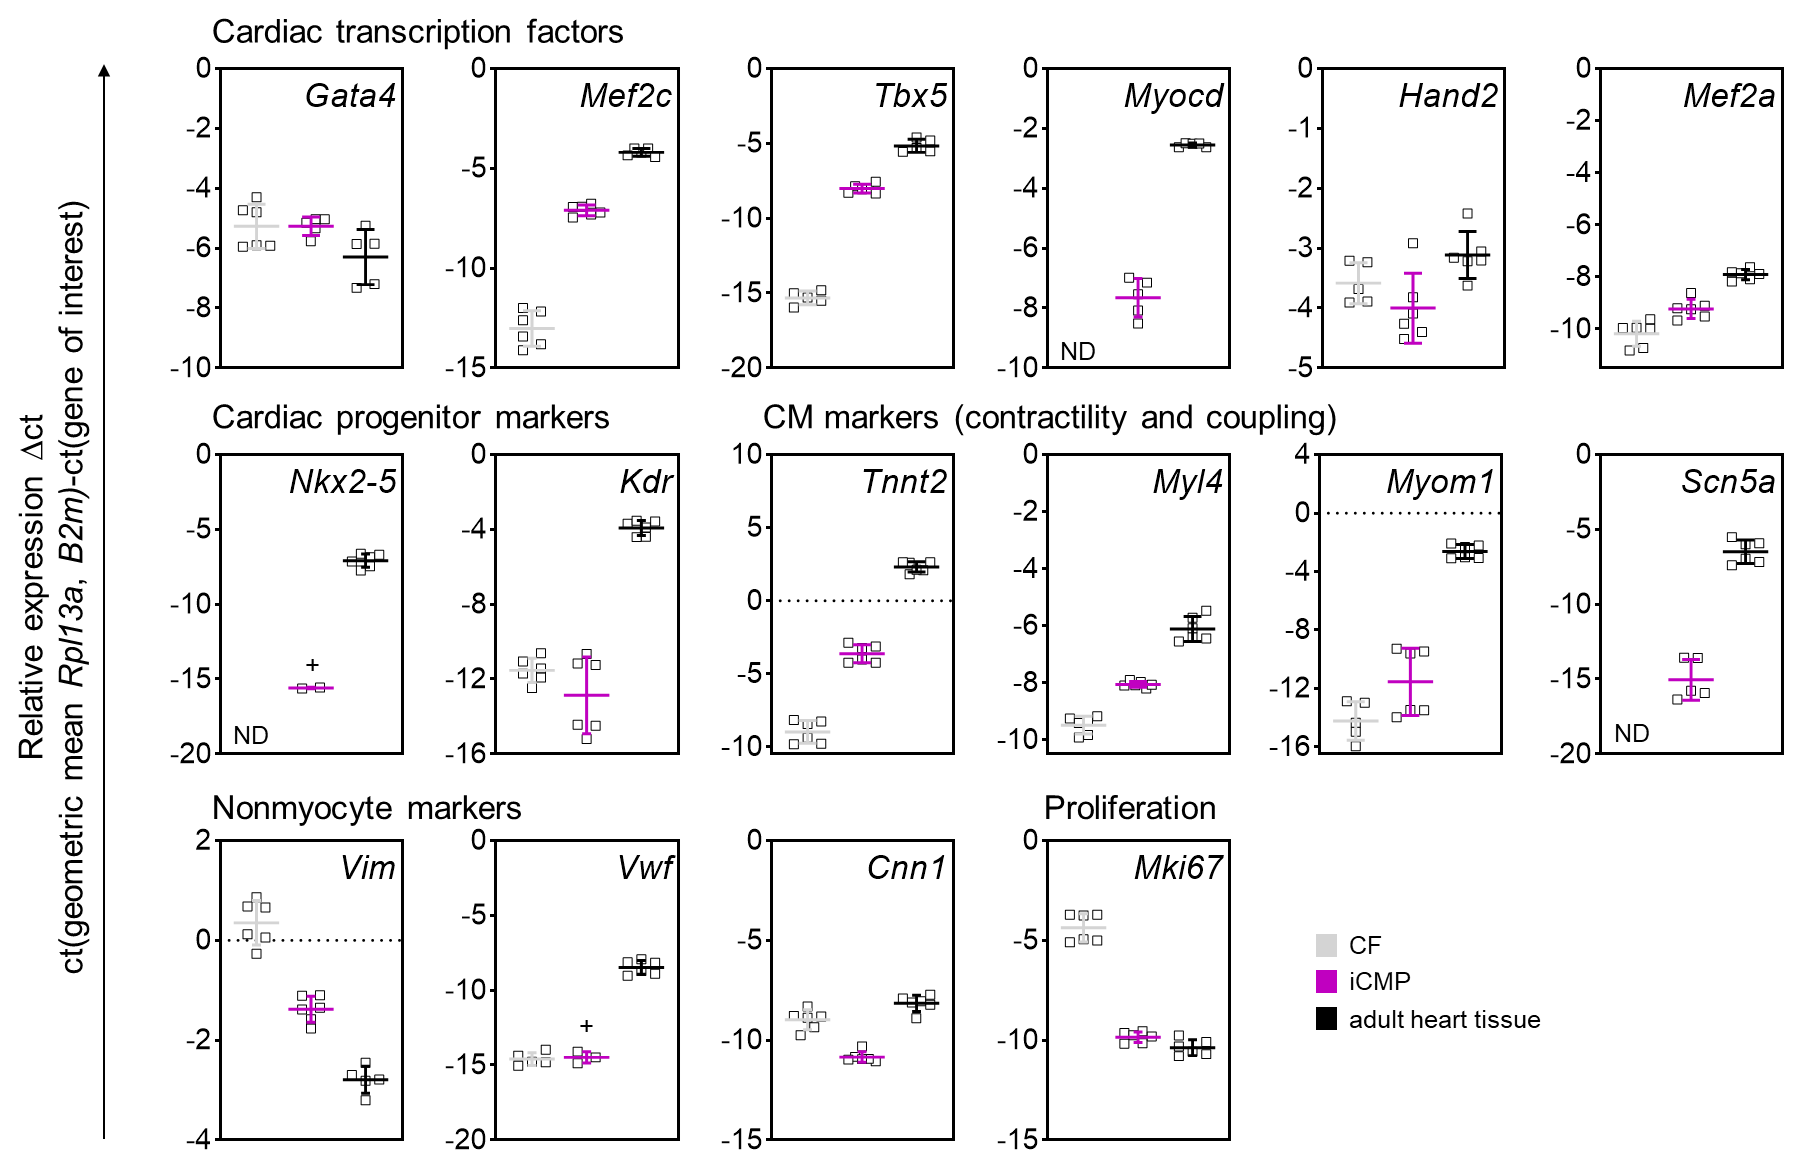
**

## Fig. S5

**Fig. S5** **Gene expression analyses using RNA sequencing and reverse transcription-quantitative PCR reveal similar expression patterns.** Validation of RNA sequencing data for selected genes by reverse transcription-quantitative PCR. Relative gene expression levels of cardiac transcription factors, cardiac progenitor markers, CM markers, nonmyocyte markers, and a proliferation marker are shown for cardiac fibroblasts (CF), purified iCMPs, and adult heart tissue. Gene expression was quantified using the ∆ct-method and was normalized to two references genes (*B2m*, *Rpl13a*). The simultaneous upregulation of progenitor and CM gene expression in iCMPs was confirmed. Nonmyocyte gene expression was not induced in iCMPs compared to fibroblasts. Skeletal muscle marker myogenic differentiation 1 (*Myod1*) was not detectable in any group. Proliferation marker gene expression was markedly reduced but still detectable, supporting the observation of continuous cell proliferation. Scatter plot graphs present replicates and mean ± SD (n=6) (ND, not detected; +, detected in a subset of samples)


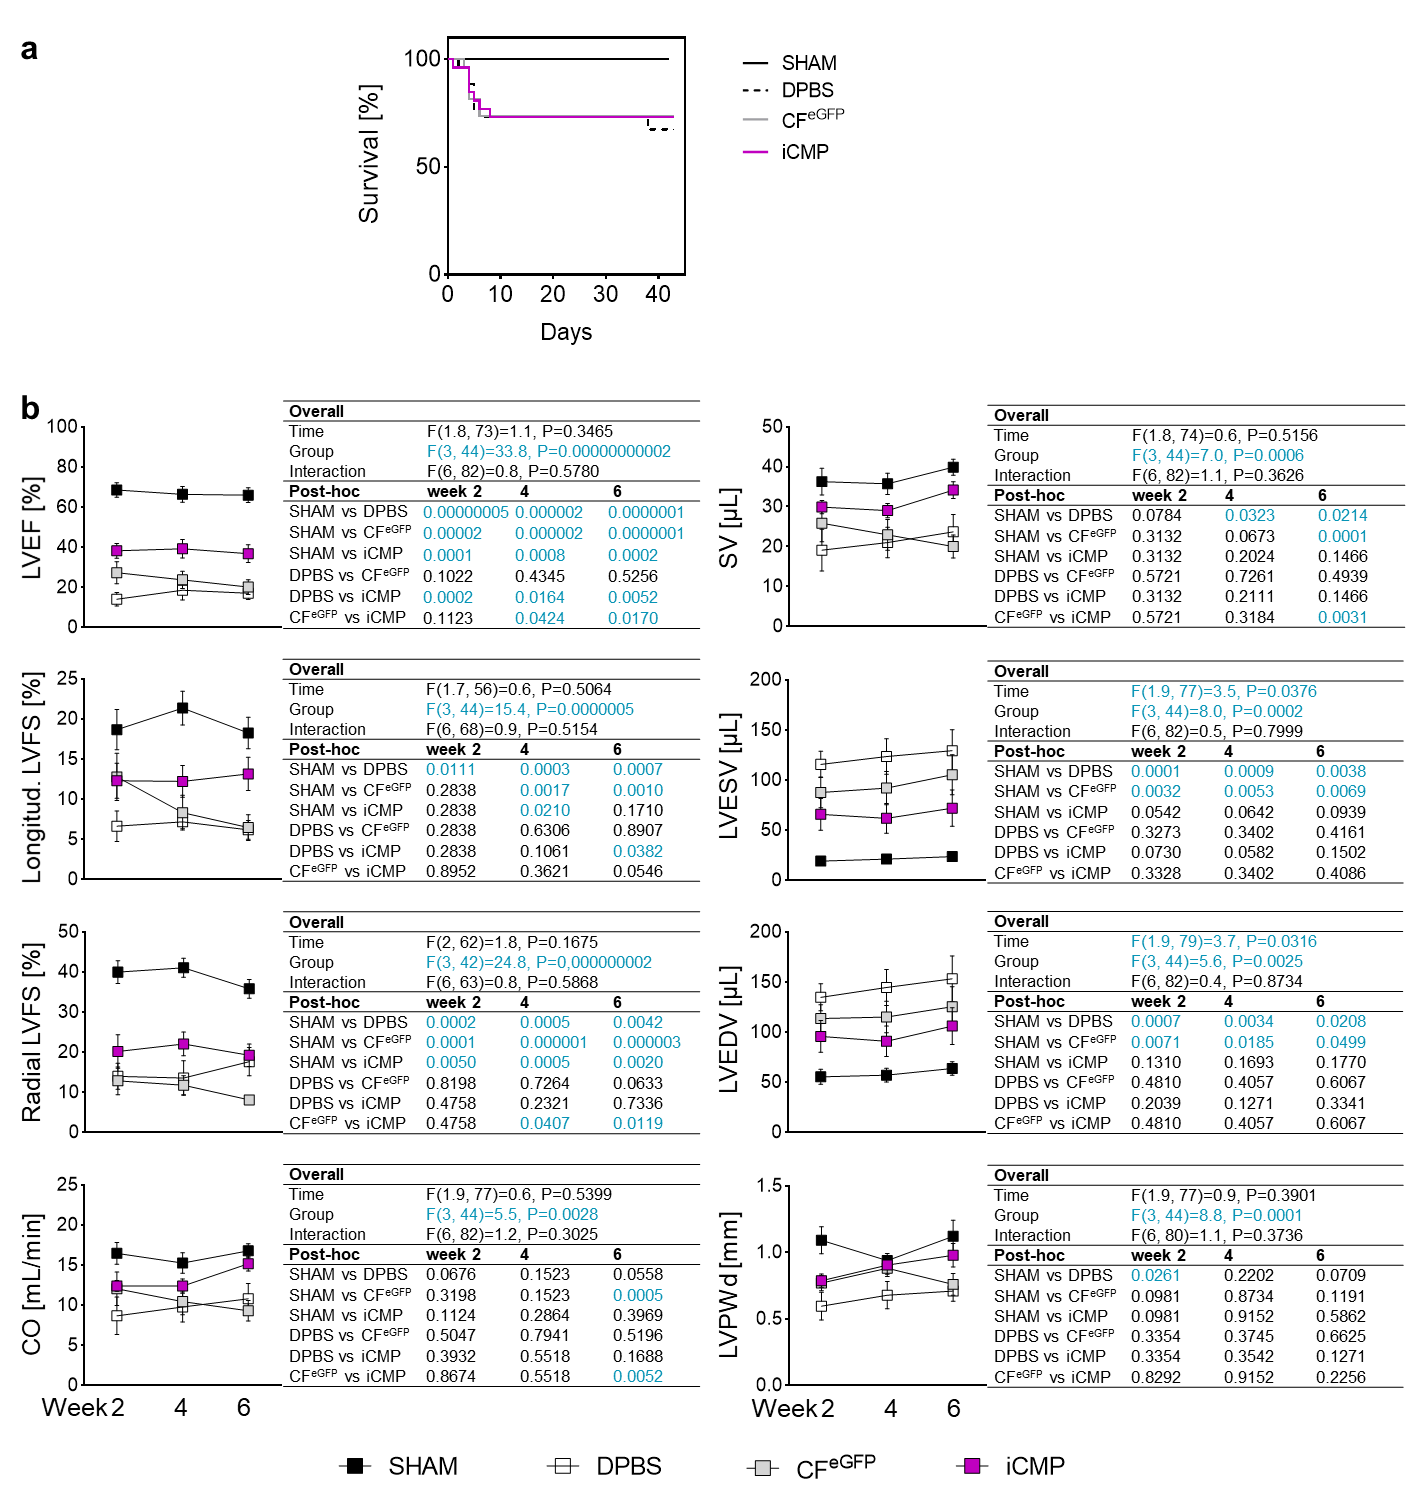


## Fig. S6

**Fig. S6** **iCMP transplantation after myocardial infarction preserves left ventricular performance.** **a** Kaplan-Meier survival analysis (nSHAM=10, nDPBS=12, nCFeGFP=14, niCMP=13 mice). Staircase graph shows that iCMP transplantation is not associated with increased mortality, supporting their safety for therapeutic application. **b** Analysis of cardiac function and geometry by transthoracic echocardiography. Provided are complete sets of longitudinal data and corresponding statistical analysis results for in vivo experiments outlined in Fig. 5. Cardiac pump function is given as LVEF. Heart contractility is given as longitudinal and radial left ventricular fractional shortening (LVFS). Blood volume supplied to the body is given as cardiac output (CO) and stroke volume (SV). Ventricle geometry is given as left ventricular end-systolic volume (LVESV), left ventricular end-diastolic volume (LVEDV), and left ventricular posterior wall thickness at end diastole (LVPWd). Line graphs show mean ± SEM (nSHAM=10, nDPBS=12, nCFeGFP=14, niCMP=13 mice). Data were analyzed using a mixed-effects model and Holm-Sidak's post-hoc tests. Significant results with P<0.05 are shown in cyan

**Table S1 Antibody details**

## Supplementary Table S1

| Immunogen, conjugate | Host | Company | Catalog no. | Application | Dilution factor |
| --- | --- | --- | --- | --- | --- |
| *Primary antibodies (clone)* |  |  |  |  |  |
| α-Actinin (EA-53) | Mouse | Sigma-Aldrich | A7811 | IC | 800 |
| α-SMA (4A4) | Mouse | Abcam | ab119952 | IC | 200 |
| CXCR4 (4G10) | Mouse | Santa Cruz Biotechnology | sc-53534 | IC | 200 |
| GATA4 (polyclonal) | Goat | Santa Cruz Biotechnology | sc-1237 | IC | 200 |
| GFP (polyclonal) | Chicken | Abcam | ab13970 | IC/IHC; FC | 1,000; 2,000 |
| ISL1 (B-1) | Mouse | Santa Cruz Biotechnology | sc-390793 | IC | 200 |
| KDR (A-3) | Mouse | Santa Cruz Biotechnology | sc-6251 | IC | 200 |
| c-Kit (E-3) | Mouse | Santa Cruz Biotechnology | sc-365504 | IC | 200 |
| MEF2C (D80C1) | Rabbit | New England Biolabs | 5030 | IC | 200 |
| Myosin (MF-20) | Mouse | Dev. Studies Hybridoma Bank | MF-20 | IC | 200 |
| MYOCD (polyclonal) | Goat | Santa Cruz Biotechnology | sc-21561 | IC | 200 |
| NKX2-5 (A-3) | Mouse | Santa Cruz Biotechnology | sc-376565 | IC | 200 |
| CD31 (polyclonal) | Rabbit | Abcam | ab28364 | IC | 200 |
| CD31 (H-3) | Mouse | Santa Cruz Biotechnology | sc-376764 | IHC | 1,600 |
| TBX5 (polyclonal) | Goat | Santa Cruz Biotechnology | sc-17866 | IC | 200 |
| cTnT (1C11) | Mouse | Abcam | ab8295 | IC/FC | 200 |
| cTnI (polyclonal) | Goat | HyTest | 4T21/2 | IHC | 1,000 |
| *Secondary antibodies* |  |  |  |  |  |
| Chicken, FITC | Donkey | Invitrogen | SA1-72000 | IHC | 250 |
| Chicken, Alexa Fluor 488 | Goat | Invitrogen | A11039 | IC | 2,000 |
| Goat, Alexa Fluor 647 | Donkey | Invitrogen | A-21447 | IHC | 250 |
| Goat, Alexa Fluor 647 | Rabbit | Abcam | AB169347 | IC | 1,000 |
| Mouse, Alexa Fluor 555 | Donkey | Invitrogen | A-31570 | IHC | 250 |
| Mouse, Alexa Fluor 647 | Goat | New England Biolabs | 4410 | IHC | 1,000 |
| Rabbit, Alexa Fluor 647 | Goat | Invitrogen | A-21245 | IC | 1,000 |
| Abbreviations: IC, immunocytology; IHC, immunohistology; FC, flow cytometry. | | | | | | |

**Table S2 Reverse transcription-quantitative PCR primer sequences**

## Supplementary Table S2

| Gene | Forward primer 5' → 3' | Reverse primer 5' → 3' |
| --- | --- | --- |
| *B2m* | TTCTGGTGCTTGTCTCACTGA | CAGTATGTTCGGCTTCCCATTC |
| *Cnn1* | GGCCCAGAAATACGACCATCA | GGTGCCAGTTCTGAGTTGACT |
| *Gata4* | GCCTGTATGTAATGCCTGCG | CATTGCTGGAGTTACCGCTG |
| *Hand2* | TCATGGATCTGCTGGCCAAG | TCTTGTCGTTGCTGCTCACT |
| *Kdr* | GGCGACTATGTTTGCTCTGC | CGCCAATGGTTGTTGTCTGA |
| *Mef2a* | CTAGGACAAGCAGCCCTCAG | GGAGGTGAAATTGGCTCTGACT |
| *Mef2c* | ACGAGGATAATGGATGAGCGT | TGCAATCTCACAGTCGCACA |
| *Mki67* | ACCTGGTCTTAGTTCCGTTGAT | CTTGGTTGGCGTTTCTCCTC |
| *Myl4* | CAAACCCAAGCCTGAAGAGATG | ACCCATGACTGTGCCGTT |
| *Myocd* | AGAATGATGCAGCCTCCCAG | CGGTTCTTACTGTCACCCAAAG |
| *Myod1* | CTGCTCTGATGGCATGATGGAT | CGCTCCACTATGCTGGACAG |
| *Myom1* | GGGCGACACTTACGTTCTCTC | CACCACATCCAAGGGTGCA |
| *Nkx2-5* | CCCAAGTGCTCTCCTGCTTT | CCATCCGTCTCGGCTTTGT |
| *Rpl13a* | TGAAGCCTACCAGAAAGTTTGC | TCCGATAGTGCATCTTGGCC |
| *Scn5a* | GAGATGCTGCTCAAGTGGGT | TCTCGGCAAAGCCTAAGGTG |
| *Tbx5* | ATGAACGTGAACTGTGGCTGA | GGCCAGTCACCTTCACTTTGT |
| *Tnnt2* | CAGAGGAGGCCAACGTAGAAG | CTCCATCGGGGATCTTGGGT |
| *Vim* | GATCAGCTCACCAACGACAAG | GTTCAAGGTCAAGACGTGCC |
| *Vwf* | GTATGGCCCACTACCTCACC | CTGCAACCCTCATTTCCCAC |
